# Supplementary material for: Human amniotic fluid contaminants alter thyroid hormone signalling and early brain development in Xenopus embryos
Source: PubMed Central journal article supplement (PMC5339866; doi:10.1038/srep43786), 2017-03-07
Supplement: srep43786-s1.pdf [file srep43786-s1.pdf]

1 **Supplementary information:**

2 **Human amniotic fluid contaminants alter thyroid hormone signalling and**  
3 **early brain development in *Xenopus* embryos**

4

5 Jean-Baptiste Fini\*<sup>1</sup>, Bilal B. Mughal\*<sup>1</sup>, Sébastien Le Mével<sup>1</sup>, Michelle Leemans<sup>1</sup>, Mélodie  
6 Lettmann<sup>1</sup>, Petra Špirhanzlová<sup>1</sup>, Pierre Affaticati<sup>2</sup>, Arnim Jenett<sup>2</sup> and Barbara A. Demeneix<sup>†1</sup>

7

8

9 **Supplementary Figure legends**

10 **Supplementary Figures**

11 **Primer list**

12 **Supplementary Table1 + Supplementary References**

13

14

15

16 **Supplementary Figures:**

17 • **Supporting information for Figure 1**

- 18 ○ Figure. S1 - (Figure 1 extended data) Thyroid disrupting activity of individual chemicals  
19 and mixture assessed with XETA without T<sub>3</sub> as a spike and mixture with a T<sub>4</sub> spike

20 • **Supporting information for Figure 2**

- 21 ○ Figure S2a - NH<sub>3</sub> abrogates GFP fluorescence induced by T<sub>3</sub> + Mixture 10x  
22 ○ Figure S2b - NH<sub>3</sub> significantly reduces GFP fluorescence in Mix 10x exposed tadpoles.  
23 ○ Figure S2c - Anti-GFP using immunohistochemistry on *Tg(thibz:eGFP)* tadpoles brains  
24 is increased by mixture exposure in absence of T<sub>3</sub>  
25 ○ Figure S2d- No change in pH observed with either T<sub>3</sub> or mixture

26

27 • **Supporting information for Figure 3**

- 28 ○ Figure S3 (Figure 3 extended data) Mixture exposure modifies thyroid hormone and  
29 neuronal development related gene expression in brain when using T<sub>3</sub> as a spike  
30 ○ Figure S4 (Figure 3 extended data) Mixture exposure modifies neuronal development  
31 related gene expression in brain in the absence of a T<sub>3</sub> spike.

32

33 • **Supporting information for Figure 4**

- 34 ○ Figure S5 - 3D brain video (CLARITY)  
35 a) Wild type whole brain  
36 b) T<sub>3</sub> treated whole brain  
37 c) Mix 10x treated whole brain  
38 ○ Figure S6 (BEHAVIOUR)  
39 a) Protocol (schematic) for assessing locomotor activity  
40 b) Distance covered by tadpoles over 10 minutes (detail minute by minute)  
41 c) Distances covered by tadpoles with regards to dark and light periods.  
42 d) Mobility video (Control): Full length video of the 12 well plate subjected to  
43 mobility assay  
44 e) Mobility video (T<sub>3</sub>): Full length video of the 12 well plate subjected to mobility  
45 assay  
46 f) Mobility video (Mixture 10x): Full length video of the 12 well plate subjected to  
47 mobility assay

48

49 **Supplementary figure legends**

50 **Figure. S1: Thyroid disrupting activity of individual chemicals and mixture assessed with**  
51 **XETA without T<sub>3</sub> as a spike and mixture with a T<sub>4</sub> spike (Figure 1 extended data):**

52 Screening of thyroid disrupting activity of molecules measured in humans with the Xenopus  
53 Embryonic Thyroid Assay (XETA), based on the quantification of fluorescence-using  
54 transgenic Thbzip-eGFP animals. Fifteen compounds were tested at different concentrations.  
55 Scattered plots are shown with mean $\pm$  SD of three to five independent experiments pooled.  
56 The GFP fluorescence was measured and quantified after 72h exposure. Chemicals tested alone  
57 without a T<sub>3</sub> spike. **a**, Phenolic compounds: BPA, Triclosan and Benzophenone-3. **b**,  
58 Phthalates: DBP and DEHP. **c**, Organochlorine pesticides: HCB and 4'4-DDE. **d**,  
59 Perfluorinated compounds: PFOA and PFOS. **e**, Polyaromatic hydrocarbons: 2-Naphtol. **f**,  
60 Halogenated compounds: Sodium perchlorate, PCB-153 and BDE-209. **g**, Metals:  
61 Methylmercury and Lead chloride. **h**, Exposure to mixed compounds alone and against T<sub>4</sub>  
62 10nM spike (**a-g**). Results represent 3 pooled experiments, normalised against T<sub>3</sub> or T<sub>4</sub> values.  
63 Statistics used meta-analysis with Kruskal-Wallis (Mean  $\pm$  SDs, \* $p$  < 0.05, \*\*\*\* $p$  < 0.0001).  
64 Hashes (###) represent  $p$  < 0.001, T<sub>4</sub> vs Control.

65

66 **Figure. S2 (Figure 2 extended data)**

67 **a) NH<sub>3</sub> abrogates GFP fluorescence induced by T<sub>3</sub> + Mixture 10x.** *Tg(thibz:eGFP)*  
68 tadpoles were exposed for 3d to Mix 1x or 10x (see table S1 for exact composition), NH<sub>3</sub>  
69 2 $\mu$ M with or without T<sub>3</sub> 5nM for 72h. Quantification of fluorescence was done on whole  
70 tadpoles' head as illustrated.

71 **b) NH<sub>3</sub> significantly reduces GFP fluorescence in Mix 10x exposed tadpoles.** Results of  
72 Fig S2a in absence of T<sub>3</sub> spike, analyzed with a specific quantification of tadpole brain  
73 fluorescence as illustrated.

74 **c) Anti-GFP using immunohistochemistry on Tg(thibz:eGFP) tadpoles brains is**  
75 **increased by mixture exposure in absence of T<sub>3</sub>.** *Tg(thibz:eGFP)* tadpoles were exposed  
76 for three days to either Mix 1x, 10x or T<sub>3</sub> 5nM. Brains were dissected after 3h fixation in  
77 PFA 4% at RT and stored in cryoprotectant until being subjected to IHC with the chicken  
78 anti eGFP antibody. Left panel represents representative brains in ventral view for each  
79 group. Regions of interest (ROI) in brain: Forebrain (FB), Midbrain (MB), Hindbrain (HB)  
80 are outlined with hashed lines. Scale bar 200 $\mu$ m. Right panel represents GFP quantification  
81 on the whole brain.

82 **d) No observable change in water pH following addition of either T<sub>3</sub> or mixture.** pH  
83 stripes (Fisher brand) with either control water (Evian + 1/10000 DMSO), T<sub>3</sub> 5.10<sup>-9</sup>M  
84 (same concentration of DMSO as in control) or mixture at 0.1x, 1x or 10x concentration.

85

86 **Figure. S3: (Figure 3 extended data) Mixture exposure modifies thyroid hormone and**  
87 **neuronal development related gene expression in brain when using T<sub>3</sub> as a spike.** Mixture

88 exposure modifies thyroid hormone and neuronal development related gene expression in brain  
89 when using T<sub>3</sub> as a spike: RT-qPCR for **a**, *dio1* **b**, *dio2* **c**, *dio3* **d**, *thra* **e**, *thrb* **f**, *sox2* **g**, *tubb2b*  
90 **h**, *mbp* and **i**, *bdnf* **j** *thibz* **k**, *klf9* **l** *mecp2*, **m** *oatp1c1*, **n** *mct8*, **o** *mct10*, **p** *lat1* and **q** *lat2*.

91 Relative fold change presented using log(2)scale against T<sub>3</sub>. Statistics used one way non  
92 parametric Kruskal-Wallis test (Medians, Whiskers boxes mean and max, \**p* < 0.05, \*\**p* <  
93 0.01, \*\*\**p* < 0.001, \*\*\*\**p* < 0.0001).

94

95 **Figure S4 (Figure 3 extended data) Mixture exposure modifies additional thyroid hormone**  
96 **and neuronal development related gene expression in brain: RT-qPCR for a, *klf9* b, *cntn4***  
97 **c, *dcx* d, *dmnt3a* e, *reelin* f, *parvalbumin* g, *nestin* h, *rora* i, *pcna* j, *olig4* k, *mecp2* and l, *gfap*,**  
98 **m *oatp1c1*, n *mct8*, o *mct10*, p *lat1*, and q *lat2* .** Relative fold change presented used log<sub>2</sub>scale  
99 with reference done on control groups. Statistics used Kruskal-Wallis tests (Medians, Whisker  
100 boxes mean and max\_black dots represents values far from the rest but not outliers)), \**p* < 0.05,  
101 \*\**p* < 0.01, \*\*\**p* < 0.001).

102

103 **Figure S5 (Videos) (related to Figure 4) - A 360° view of the 3D brain reconstructed after**  
104 **imaging the brains exposed to CLARITY**

- 105 a) Wild type whole brain (avi file in folder)  
106 b) T<sub>3</sub> treated whole brain (avi file in folder)  
107 c) Mix 10x treated whole brain (avi file in folder)

108

109 **Figure S6 (related to Figure 4) (BEHAVIOUR)**

- 110 a) Protocol (schematic) for assessing locomotor activity. NF48 tadpoles exposed for 3 days  
111 are placed one/well in a 12 well plate. Each well contains 4ml of water. Each individual is  
112 video tracked for 10 min. Every 30 seconds, light goes on or off in order to stimulate the  
113 movements.  
114 b) Distance covered by tadpoles over 10 minutes (detail minute by minute)  
115 c) Distances covered by tadpoles with regards to dark and light periods.  
116 d) Mobility video (Control): Full length video of the 12 well plate subjected to mobility  
117 assay  
118 e) Mobility video (T<sub>3</sub>): Full length video of the 12 well plate subjected to mobility assay  
119 f) Mobility video (Mixture 10x): Full length video of the 12 well plate subjected to mobility  
120 assay

121

122

123

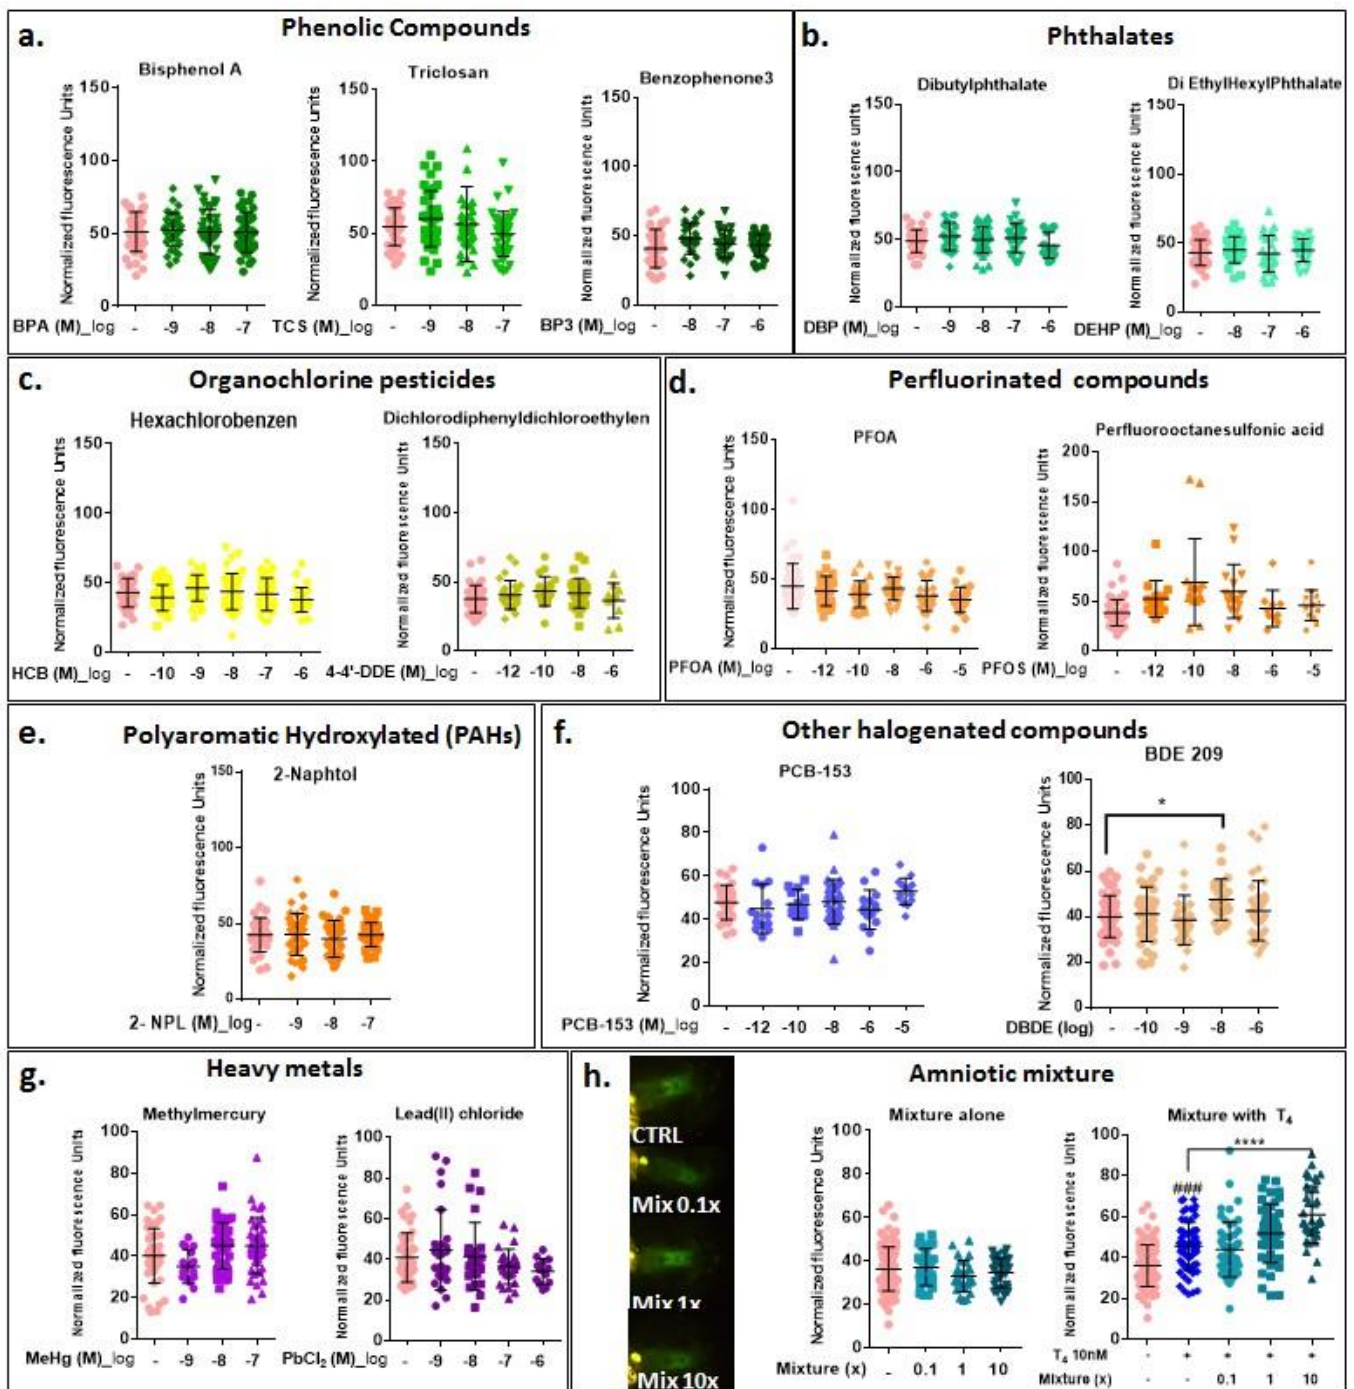

125

126

Figure S1

127

128

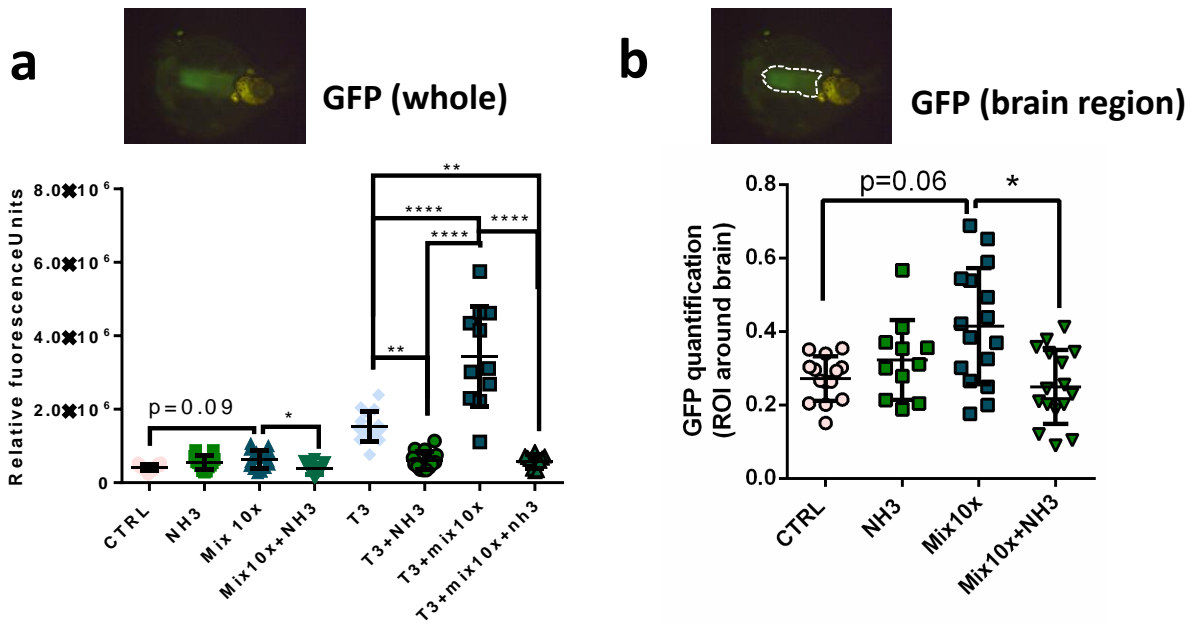

129

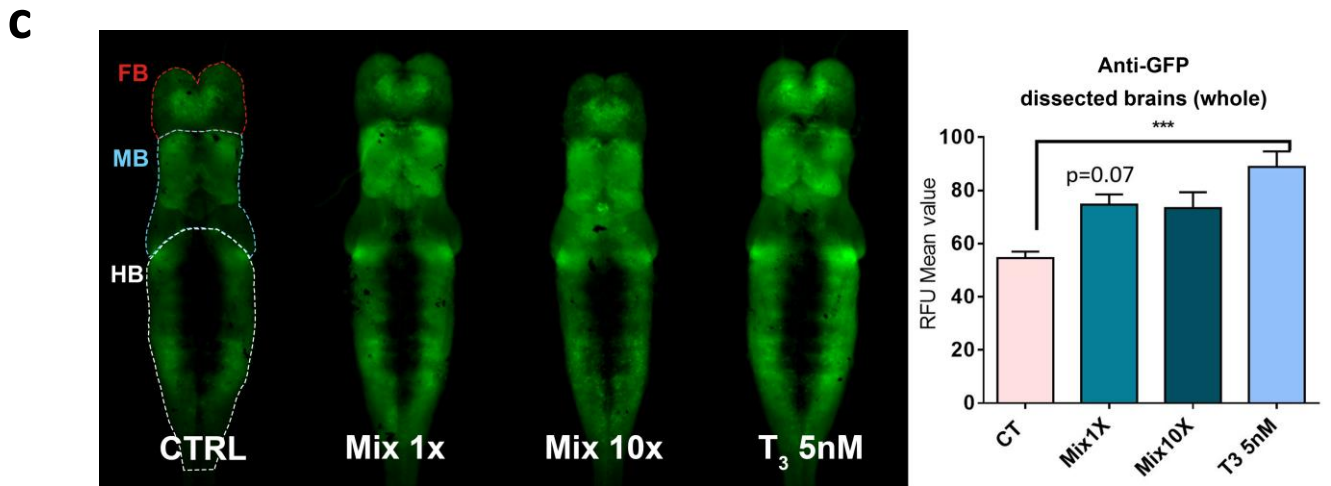

130

131

**d**

132

133

134

135

136

137

138

139

140

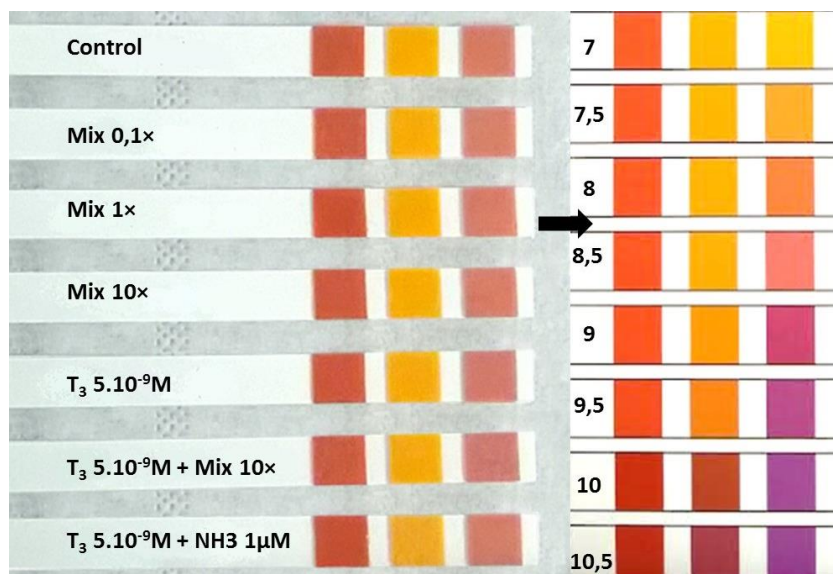

Figure

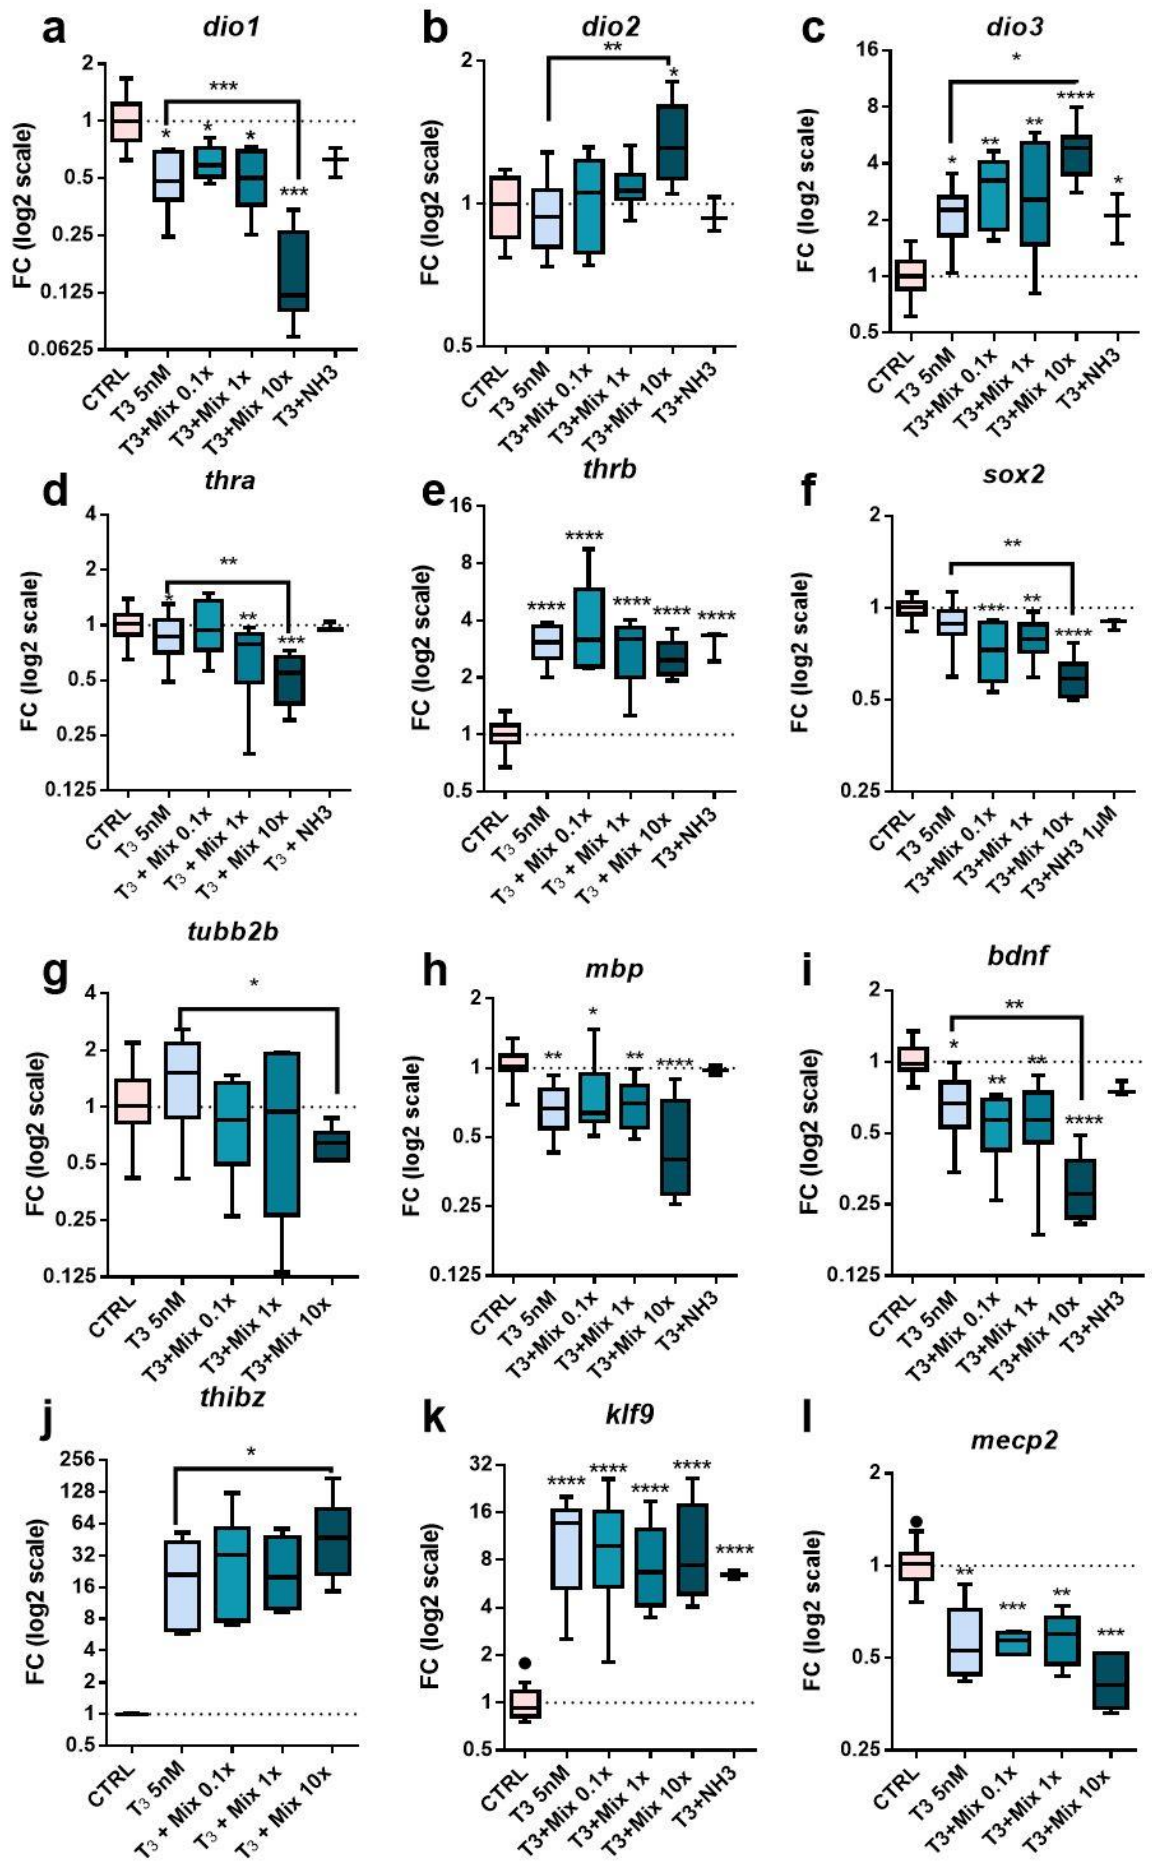

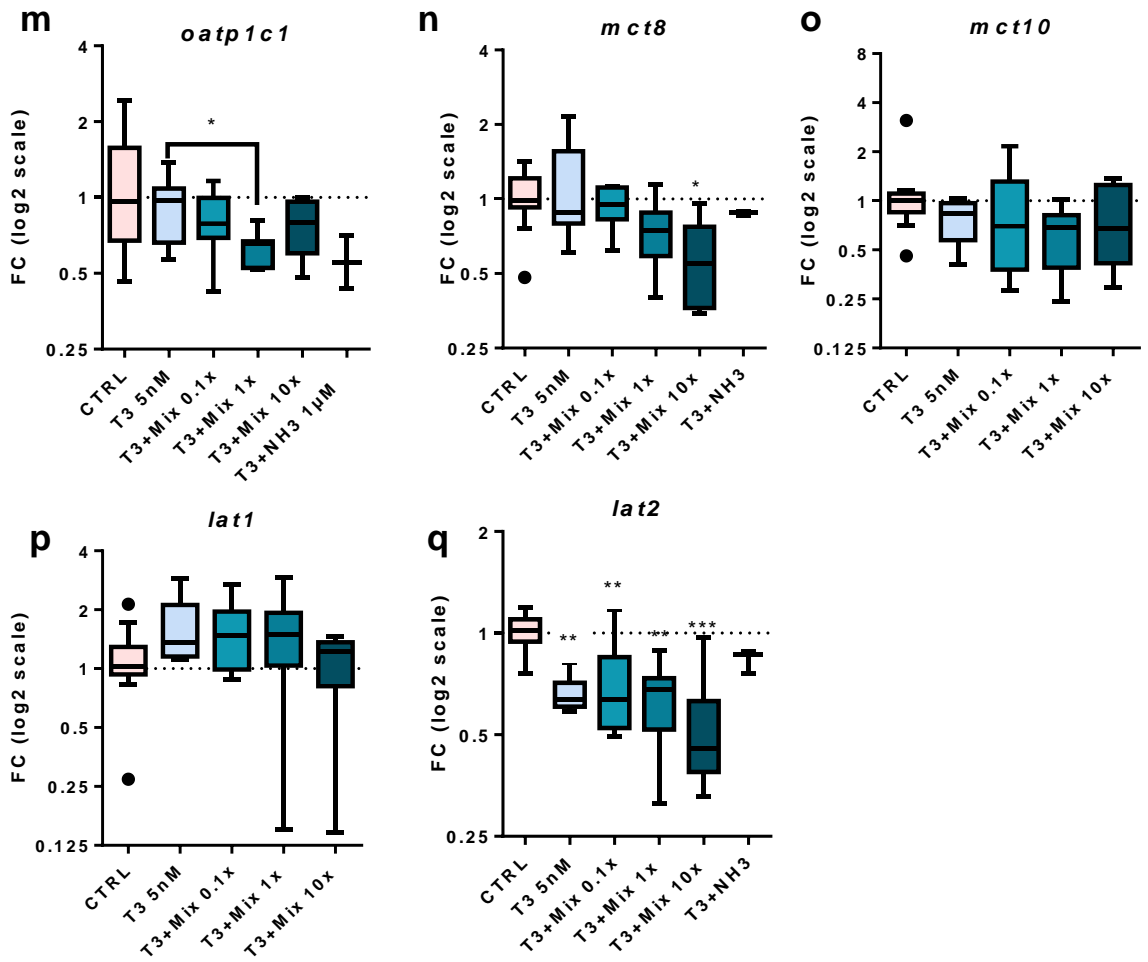





Figure S4

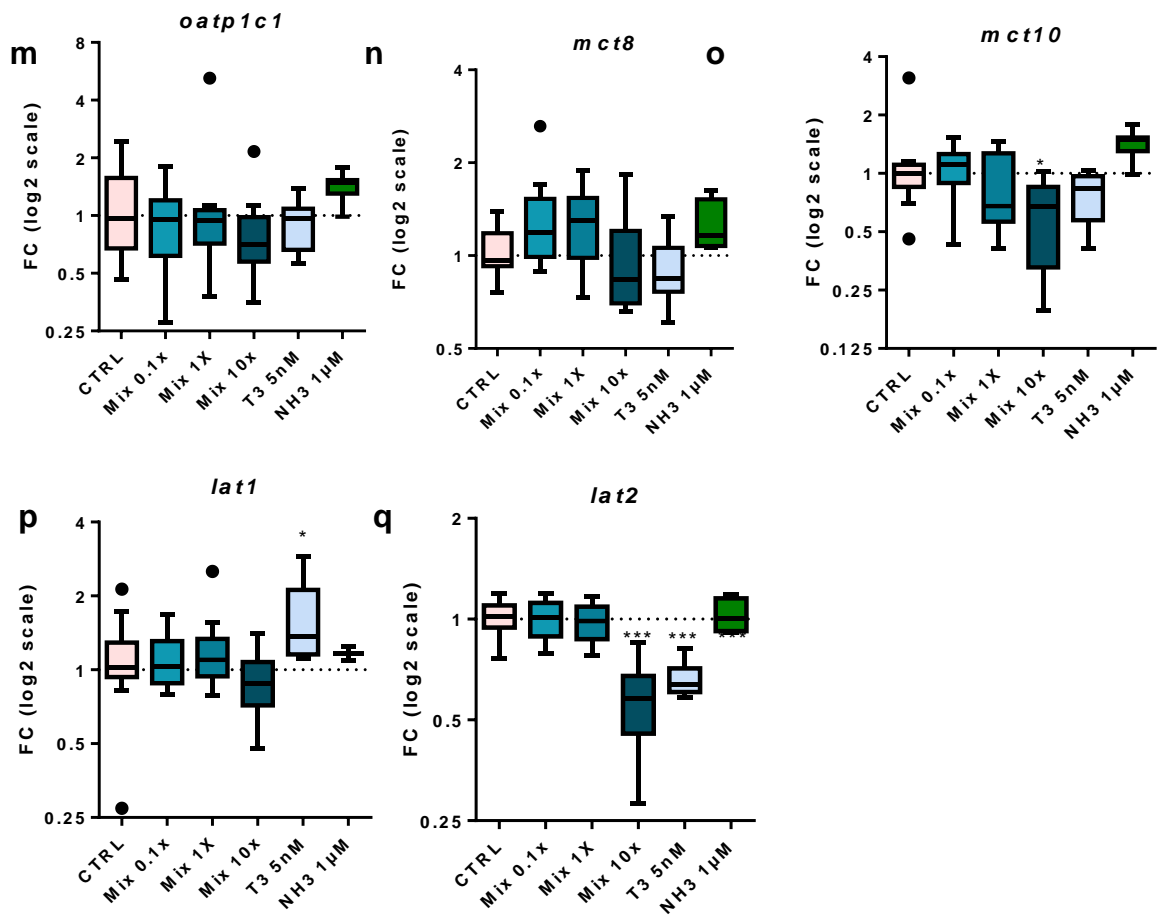

Figure S4 (continued)

152

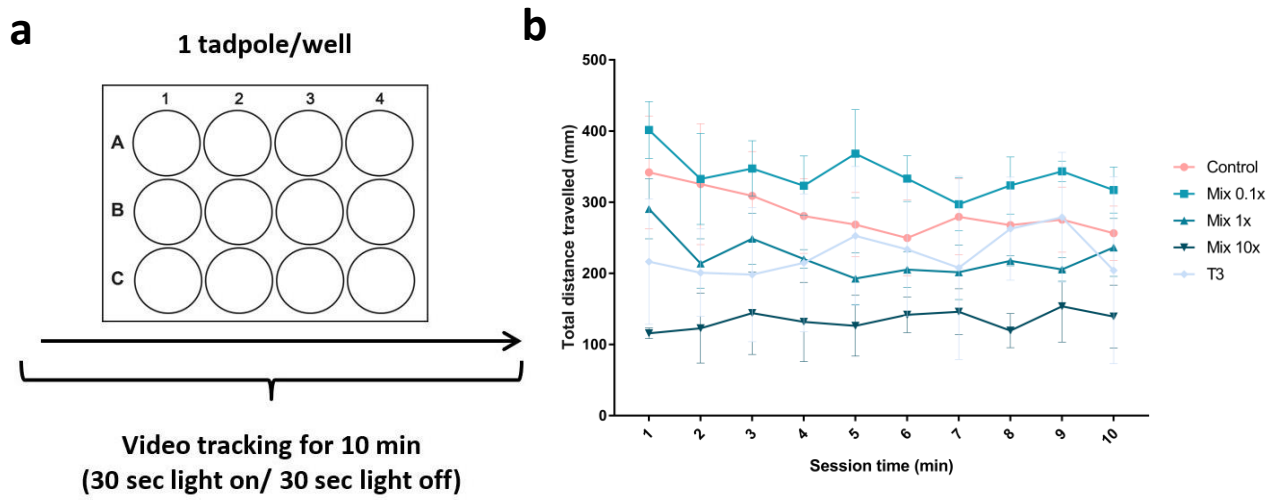

153

154

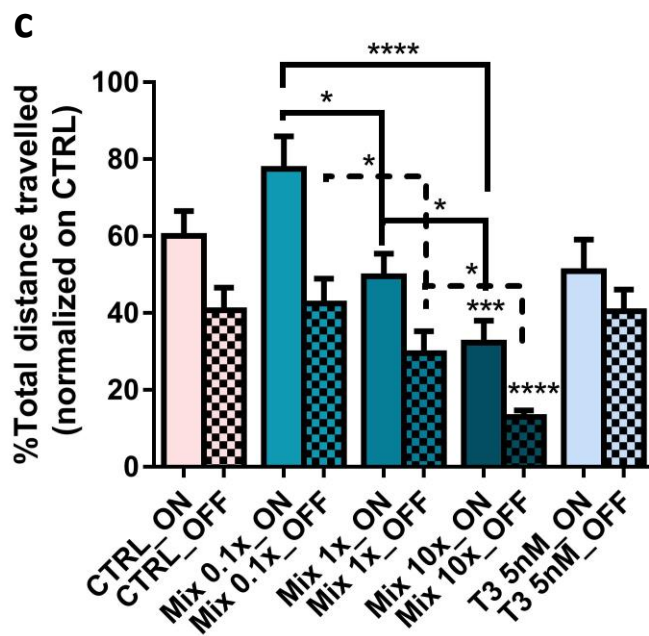

155

156

Figure S6



| Gene name            | Forward Sequence (5' - 3')     | Reverse Sequence (5' - 3')       | Gene Accession/Xenbase id |
|----------------------|--------------------------------|----------------------------------|---------------------------|
| <b>dio1</b>          | 5'-CAGCAGATGAATGGGCATTGA-3'    | 5'-TGTCTAACACTACTGGGCAAGAAGGT-3' |                           |
| NM 001095667.1       |                                |                                  | NM 001095667.1            |
| Long Copy            |                                |                                  | XB-GENE-979948            |
| Short copy           |                                |                                  | XB-GENE-17345940          |
| <b>dio2</b>          | 5'-CAAATCCAGCCAGAGAGTCAATGG-3' | 5'-TGACCTGCTTGTAGGCATCCA-3'      |                           |
| AF354707.1           |                                |                                  | AF354707.1                |
| Long Copy            |                                |                                  | XB-GENE-1017482           |
| Short copy           |                                |                                  | XB-GENE-17339189          |
| <b>dio3</b>          | 5'-CACAAAAAGTGCACCAAACG-3'     | 5'-GCCTTGTTGCAGTTTACT-3'         |                           |
| NM 001087863.1       |                                |                                  | NM 001087863.1            |
| Long Copy            |                                |                                  | XB-GENE-865707            |
| Short Copy           |                                |                                  | XB-GENE-17336015          |
| <b>thra</b>          | 5'-CGCCTTGGTCTCTTCGGAT-3'      | 5'-CCAGAAGTGGGGAATGTTGTGTT-3'    |                           |
| NM 001088126.1       |                                |                                  | NM 001088126.1            |
| Long Copy            |                                |                                  | XB-GENE-5966552           |
| Short Copy           |                                |                                  | XB-GENE-17340389          |
| <b>thrb</b>          | 5'-AAGAGTGGTTGATTTGCCAAAA-3'   | 5'-AGGGACATGATCTCCATACAACAG-3'   |                           |
| NM 001097064.1       |                                |                                  | NM 001097064.1            |
| Long Copy            |                                |                                  | XB-GENE-6070716           |
| Short Copy           |                                |                                  | XB-GENE-6252616           |
| <b>sox2</b>          | 5'-CCAGTCCACCTGTAGTCACCTCT-3'  | 5'-CACTTCTGCCCCAGGTAGGTAC-3'     |                           |
| NM 001088222.1       |                                |                                  | NM 001088222.1            |
| AF022928.1           |                                |                                  | AF022928.1                |
| Long Copy            |                                |                                  | XB-GENE-865099            |
| Short Copy           |                                |                                  | XB-GENE-17341038          |
| <b>tubb2b (ntub)</b> | 5'-ACACGGCATTGATCCTACAG-3'     | 5'-AGCTCCTTCGGTGTAAATGAC-3'      |                           |
| NM 001086064.1       |                                |                                  | NM 001086064.1            |
| Long Copy            |                                |                                  | XB-GENE-866032            |
| Short Copy           |                                |                                  | XB-GENE-17340462          |

|                |                                |                                 |                  |
|----------------|--------------------------------|---------------------------------|------------------|
| mpb            | 5'-GATCAAAGCAAATGGCAACA-3'     | 5'-AACCTGCCAGTGAGTCAAG-3'       |                  |
| NM 001090291.1 |                                |                                 | NM 001090291.1   |
| Long Copy      |                                |                                 | XB-GENE-959622   |
| Short Copy     |                                |                                 | XB-GENE-17333093 |
|                |                                |                                 |                  |
| bdnf           | 5'-CCCCATGAAAGAAGCCAGT-3'      | 5'-ACTGGGACCACCTATGCTCT-3'      |                  |
| NM 001085482.1 |                                |                                 | NM 001085482.1   |
| Long Copy      |                                |                                 | XB-GENE-6252642  |
| Short Copy     |                                |                                 | XB-GENE-955559   |
|                |                                |                                 |                  |
| thibz          | 5'-ACCTCCACAGAATCAGCAGC-3'     | 5'-GCAGAGAACGAGCAAGGAGT-3'      |                  |
| NM 001085805.1 |                                |                                 | NM 001085805.1   |
| Long Copy      |                                |                                 | XB-GENE-6252652  |
| Short Copy     |                                |                                 | XB-GENE-865112   |
|                |                                |                                 |                  |
| klf9           | 5'-TGTGGCAAAGTTTATGGGAAGTCT-3' | 5'-GGCGTTCACCTGTATGGACTCT-3'    |                  |
| NM 001085597.1 |                                |                                 | NM 001085597.1   |
| U35409.1       |                                |                                 | U35409.1         |
| Long Copy      |                                |                                 | XB-GENE-865026   |
| Short Copy     |                                |                                 | XB-GENE-6252653  |
|                |                                |                                 |                  |
| mecp2          | 5'-CCATGTACGAAGACCCCACTCT-3'   | 5'-GACCAGATTTTCTTTGCTTGAGTTT-3' |                  |
| NM 001088385.1 |                                |                                 | NM 001088385.1   |
| Long Copy      |                                |                                 | XB-GENE-17346751 |
| Short Copy     |                                |                                 | XB-GENE-494744   |
|                |                                |                                 |                  |
| cntn4          | 5'-CAGAGCAAAGGACGCCTACA-3'     | 5'-AGCACTGATACATGCCGGAG-3'      |                  |
| NM 001091581.1 |                                |                                 | NM 001091581.1   |
| Long Copy      |                                |                                 | XB-GENE-17337426 |
| Short Copy     |                                |                                 | XB-GENE-866211   |
|                |                                |                                 |                  |
| dcx            | 5'-ACACCCAAATCCAAGCAGTC-3'     | 5'-TCAGAGTCATCCAGAGACAGG-3'     |                  |
| No NCBI        |                                |                                 |                  |
| Long Copy      |                                |                                 | XB-GENE-17344744 |
| Short Copy     |                                |                                 | XB-GENE-17344745 |

|                |                                  |                               |                     |
|----------------|----------------------------------|-------------------------------|---------------------|
| dnmt3a         | 5'-CCAGAAAGGTTTTCCCATCA-3'       | 5'-CGATCATCTGCTTGTTCTGG-3'    |                     |
| No NCBI        |                                  |                               |                     |
| Long Copy      |                                  |                               | XB-GENE-6488573     |
| Short Copy     |                                  |                               | XB-GENE-17330625    |
|                |                                  |                               |                     |
| reelin         | 5'-TTGTGAATATTCTTTTGCCTGCTAGT-3' | 5'-GCCACCAGCGGAAACG-3'        |                     |
| AF427525.1     |                                  |                               | AF427525.1          |
| Long Copy      |                                  |                               | XB-GENE-982846      |
| Short Copy     |                                  |                               | XB-GENE-17331849    |
|                |                                  |                               |                     |
| parvalbumin    | 5'-AGCCGCTGACTCATTTAACC-3'       | 5'-ACTTCGATCCTGGTCGAGAA-3'    | Sequence in the box |
| No NCBI        |                                  |                               |                     |
| Long Copy      |                                  |                               | Xelaev18023736m     |
| Short Copy     |                                  |                               | Xelaev18025727m     |
|                |                                  |                               |                     |
| nestin         | 5'-GAGGTGGCCACATACAGGTC-3'       | 5'-TGCAGTTCATTTTTGTCACCA-3'   |                     |
| NM 001087857.1 |                                  |                               | NM 001087857.1      |
| Long Copy      |                                  |                               | XB-GENE-17340193    |
| Short Copy     |                                  |                               | XB-GENE-865974      |
|                |                                  |                               |                     |
| Rora           | 5'-TGTAAGGGTTTCTTCCGACGAA-3'     | 5'-TCTGGCGTGGACATGAGTAAGT-3'  | Sequence in the box |
| No NCBI        |                                  |                               |                     |
| Long Copy      |                                  |                               | XB-GENE-17343726    |
| Short Copy     |                                  |                               | XB-GENE-17343727    |
|                |                                  |                               |                     |
| pcna           | 5'-CGTCGCGGTAATCCCTTACA-3'       | 5'-CCAACACCTTCTTCAGGATGGA-3'  |                     |
| NM 001087542.1 |                                  |                               | NM 001087542.1      |
| Long Copy      |                                  |                               | XB-GENE-972527      |
| Short Copy     |                                  |                               | XB-GENE-17342178    |
|                |                                  |                               |                     |
| olig4          | 5'-GCGGGAAGTGATGCCATACT-3'       | 5'-TGGAAATTTTGGAGAGCTTTTCG-3' |                     |
| No NCBI        |                                  |                               |                     |
| Long Copy      |                                  |                               | XB-GENE-6488436     |
| Short Copy     |                                  |                               | XB-GENE-17335240    |

|                |                                |                                  |                               |
|----------------|--------------------------------|----------------------------------|-------------------------------|
| mct8           | 5'-CATTGCAGGCCTCTTACGTG-3'     | 5'-TCTCTCATGGACCAGCGGTA-3'       |                               |
| XM 018232946.1 |                                |                                  | XM 018232946.1                |
| Long Copy      |                                |                                  | XB-GENE-17342332              |
| Short Copy     |                                |                                  | XB-GENE-17342333              |
|                |                                |                                  |                               |
| oatplc1        | 5'-GTCCGTACTGCTGCTCGATGT-3'    | 5'-TGGGAGCGTCTCCAGTACAA-3'       |                               |
| No NCBI        |                                |                                  |                               |
| Long Copy      |                                |                                  | XB-GENE-17343436              |
| Short Copy     |                                |                                  | XB-GENE-17343437              |
|                |                                |                                  |                               |
| mct10          | 5'-TTGGTCCACCTATTGCAGGTATT-3'  | 5'-TGGATCCATGGTATCAGGCATA-3'     |                               |
| No NCBI        |                                |                                  |                               |
| Long Copy      |                                |                                  | XB-GENE-6487093               |
| Short Copy     |                                |                                  | XB-GENE-17345674              |
|                |                                |                                  |                               |
| lat1           | 5'-GGCCTATCAAGGTAAACATTTTGC-3' | 5'-CACACTCAACAGGTGTCATGTAGAAT-3' |                               |
| NM 001090065.1 |                                |                                  | NM 001090065.1/NM 001096373.1 |
| Long Copy      |                                |                                  | XB-GENE-6254908               |
| Short Copy     |                                |                                  | XB-GENE-865334                |



|    | Family/ complete name                       | Molecule (abbreviation)_CAS n°                                                | Use                                                            | DETECTION RATE in pregnant women (non pregnant) WOODRUFF 2011 | Tolerable daily intake                                                                                                                                  | Concentrations measured in urine during pregnancy                                                                                                                                                                                                                                                                                                              | Concentrations measured in human serum                                                                                                                                                                                                                   | Median concentration found in umbilical cord blood serum                                                                                                                                         | Median concentration measured in amniotic fluid                                                                                                                                                                                                                                                                                                                                                                                                 | Molecular Weight             | Molarity/ mass          | Final Concentration in the mixture 0.1x | Final concentration in the mixture 1x | Final concentration in the mixture 10x | Mixture mother solution concentrations (100 000x in DMSO) | Volume of each compound at 10-1M concentration (µl) |
|----|---------------------------------------------|-------------------------------------------------------------------------------|----------------------------------------------------------------|---------------------------------------------------------------|---------------------------------------------------------------------------------------------------------------------------------------------------------|----------------------------------------------------------------------------------------------------------------------------------------------------------------------------------------------------------------------------------------------------------------------------------------------------------------------------------------------------------------|----------------------------------------------------------------------------------------------------------------------------------------------------------------------------------------------------------------------------------------------------------|--------------------------------------------------------------------------------------------------------------------------------------------------------------------------------------------------|-------------------------------------------------------------------------------------------------------------------------------------------------------------------------------------------------------------------------------------------------------------------------------------------------------------------------------------------------------------------------------------------------------------------------------------------------|------------------------------|-------------------------|-----------------------------------------|---------------------------------------|----------------------------------------|-----------------------------------------------------------|-----------------------------------------------------|
| 1  | Environmental phenols                       | Bisphenol A (BPA)_80-05-7                                                     | plasticizer                                                    | 96% (96%)                                                     | 4 µg/kg bw/day                                                                                                                                          | 1.63 µg/L (Woodruff et al., 2011) 1.36µg/L (Aris 2014) 0.4µg/L (Jiménez-Díaz et al., 2016)                                                                                                                                                                                                                                                                     | 0,49+/-2,47 ng/ml (Burstyn et al., 2013) (pregnant mother) 7.43 µg/L (Shekhar et al., 2016)                                                                                                                                                              | 1,23 ng/ml (Aris 2014) 0,16ng/ml (Gerona et al 2013)                                                                                                                                             | [0-0,46] (Eldow et al., 2012) _second trimester: [nd-0,75ng/ml] median 0,47 ng/ml (Chen et al., 2011) _NO (Philippat et al., 2013) 7.75 µg/L (Shekhar et al., 2016)                                                                                                                                                                                                                                                                             | 228.29 g/mol                 | 0.2 10-8M (0.5 µg/L     | 0.2 10-9M                               | 0.2 10-8M                             | 0.2 10-7M                              | 0.2 10-3M                                                 | 2                                                   |
| 2  | Environmental phenols                       | Triclosan (TCS), dichlorophenoxyphenol _3380-34-5                             | antibacterial conservator (cosmetic)                           | 87%(81%)                                                      | Substances for which an Acceptable Daily Intake or Tolerable Daily Intake could not be established, but where the present use could be accepted.5 mg/kg | 23.81µg/L (Woodruff et al., 2011)                                                                                                                                                                                                                                                                                                                              |                                                                                                                                                                                                                                                          |                                                                                                                                                                                                  | 19.4µg/l (amniotic high quartile) Philippat et al., 2013 7.04 µg/L (Shekhar et al., 2016)                                                                                                                                                                                                                                                                                                                                                       | 289.54 g/mol                 | 0.7 10-7M (19.4µg/L)    | 0.7 10-8M                               | 0.7 10-7M                             | 0.7 10-6M                              | 0.7 10-2M                                                 | 70                                                  |
| 3  | Environmental phenols                       | benzophenone-3 (BP-3)-oxybenzone _131-57-7                                    | UV filter (cosmetics)_                                         | 100%(98%)                                                     | 0.03mg/kg b.w./day                                                                                                                                      | 38.09 µg/l (Woodruff et al., 2011) 4.7µg/L Median/ Max : 3200µg/L (hines et al., 2015) 77µg/L Median (Phillipat et al., 2013)                                                                                                                                                                                                                                  |                                                                                                                                                                                                                                                          |                                                                                                                                                                                                  | 0-15.7µg/l (amniotic) Median 0,8 µg/l Philippat et al., 2013                                                                                                                                                                                                                                                                                                                                                                                    | 182.22 g/mol                 | 0.86 10-7M (15.7 µg/l)  | 0.9 10-8M                               | 0.86 10-7M                            | 0.86 10-6M                             | 0.86 10-2M                                                | 86                                                  |
| 8  | Phthalates                                  | Dibutyl phthalate (DBP)_84-74-2                                               | softener (plastic, shampoo)                                    | 99% (99%) _MBP                                                | 0.01 mg/kg body weight per day                                                                                                                          | 18.83 µg/l (geometric mean in pregnant women 50th percentile 17.1 µg/l 95th percentile 143.8 µg/l (Woodruff et al., 2011) data for MBP _metabolite MBP in mother urine 1st trimester [8,9;26,9;78;30,9] max 541 mg/l (females group) _ [19,4;28,1;79,6;232,6] max=524 mg/l (males group) Huang e al *; 2009 226.53 µg/l (geometric mean) (Woodruff et al 2011) |                                                                                                                                                                                                                                                          | 68.14 µg/l (cord blood) (Huang et al., 2014) _ cord blood serum 6µg/l ( Zhang et al., 2009) _ Meconium 6mg/g (Zhang et al., 2009)                                                                | around 80µg/ of MBP in amniotic fluid (50th-percentile male et females) [39,3;45,6;85,5;134,6] max =192 µg/l (female groupe for MBP) Huang et al 2009 [26,4;44,3;81,3;127,8] max=145 µ/L ml male group Huang et al 2009                                                                                                                                                                                                                         | 278.34 g/mol MBP 222.24g/mol | 0.24 10-6M (53.4 µg/l)  | 0.24 10-7M                              | 0.24 10-6M                            | 0.24 10-5M                             | 0.24 10-1M                                                | 240                                                 |
| 7  | Phthalates                                  | di-2-éthylhexylphthalate (DEHP)_117-81-7                                      | plastic softener                                               | 100% (100%)_MEP                                               | 0.05 mg/kg body weight per day                                                                                                                          | 226.53 µg/l (geometric mean) (Woodruff et al 2011)                                                                                                                                                                                                                                                                                                             |                                                                                                                                                                                                                                                          | 187.16 µg/l (cord blood ) Huang et al., 2014 _ cord blood serum : 1µg/l ( Zhang et al., 2009) _mothermilk 10µg/l (Main et al 2006)                                                               | DEHP metabolite at 0.27µg/l (median Jensen et al 2012) 22.1 µg/l 50 percentile (amniotic fluid MEHP)[0,5;24,91,1] (max 148µg/l) for females and [0,2;6,22,1;100,6] max 110 µg/l males ( amniotic fluid MEHP) Huang et al., 2009 1,7-2,6 µg/l Silva et al. 2004 (metab) _                                                                                                                                                                        | 390.56 g/mol MEHP: 278.15    | 0.08 10-6M (22.1 µg/l)  | 0.1 10-7M                               | 0.1 10-6M                             | 0.1 10-5M                              | 0.11 10-1M                                                | 110                                                 |
| 5  | Organochlorine pesticides                   | Hexachlorobenzén (HCB)_118-74-1                                               | fungicide, pesticide and precursor of synthetic caoutchouc     | 100% (99%)                                                    | 0.16 mg/kg body weight per day                                                                                                                          |                                                                                                                                                                                                                                                                                                                                                                | 13.74 ng/g lipid (Woodruff et al., 2011) (pregnant mother)                                                                                                                                                                                               |                                                                                                                                                                                                  | 0.023µg/l (median levels ) or 0.097µg/l (mean) in amniotic fluids 100 women tenerife ( Luzardo et al, 2009) 0.24 ng/l (Germany Van der Ven et al. 1992) 0.02 ng/l (mean in Tanzania Van der Ven et al. 1992) 0.032 µg/l (mean in Meeker et al 2009) 6.6µg/l (mean in Daglioglu et al. 2013) 0.21 µg/l mean (Foster et al., 2000) 0.030µg/l (mean in Luzardo et al. 2009) 0.384µg/l (mean Meeker at 1 2009) 5.4µg/l mean (Daglioglu et al. 2013) | 284.78 g/mol                 | 0.8 10-11M (0.0023µg/l) | 0.8 10-12M                              | 0.8 10-11M                            | 0.8 10-10M                             | 0.8 10-6M                                                 | 0.8                                                 |
| 4  | Organochlorine pesticides                   | Dichlorodiphenyldichloroethylene (4-4' DDE, p,p'DDE metabolite DDT), _72-55-9 | insecticide (DDT metabolite)                                   | 100% (99%)                                                    | PTDI of 0.01 mg/kg b.w (provisional TDI)                                                                                                                |                                                                                                                                                                                                                                                                                                                                                                | 198.34 ng/g lipid (Woodruff et al., 2011) (pregnant mother)                                                                                                                                                                                              |                                                                                                                                                                                                  | 0.1 µg/l mean (Foster et al., 2000) 0.030µg/l (mean in Luzardo et al. 2009) 0.384µg/l (mean Meeker at 1 2009) 5.4µg/l mean (Daglioglu et al. 2013)                                                                                                                                                                                                                                                                                              | 318.02 g/mol                 | 0.66 10-9M (0.21 µg/l)  | 0.7 10-10M                              | 0.66 10-9M                            | 0.66 10-8M                             | 0.66 10-4M                                                | 0.66                                                |
| 13 | Perfluorinated compounds                    | Perfluorooctanoic acid (PFOA)_335-67-1                                        | fluorosurfactant                                               | 99% (99%)                                                     | 150 ng/kg b.w./day                                                                                                                                      |                                                                                                                                                                                                                                                                                                                                                                | 50th percentile 2.6µg/l; 95th percentile 5.6µg/l (Woodruff et al., 2011) [0.309-7.3] median 1.045 µg/l (Cariou et al., 2015) (pregnant mother)                                                                                                           | [0.311-7.06] µg/l median 0.860 µg/l (Cariou et al. 2015)                                                                                                                                         | 0.1-1.8 µg/l mean 0.3µg/l (amniotic fluid) Stei et al., 2012                                                                                                                                                                                                                                                                                                                                                                                    | 414.07 g/mol                 | 0.43 10-8M (1.8µg/l)    | 0.43 10-9M                              | 0.43 10-8M                            | 0.43 10-7M                             | 0.43 10-3M                                                | 4.3                                                 |
| 12 | Perfluorinated compounds                    | Perfluorooctanyl sulfonate (PFOS)_ 1763-23-1                                  | fluorosurfactant                                               | 99% (100%)                                                    | 0.3 µg/kg bw/day                                                                                                                                        |                                                                                                                                                                                                                                                                                                                                                                | 50th percentile: 12µg/l; 95th percentile 21.8µg/l (Woodruff et al., 2011) [0.316-24.5] median 3.065 µg/l (Cariou et al; 2015) (pregnant mother)                                                                                                          | [nd-8.04]µg/l median 1.115µg/l (Cariou et al., 2015)                                                                                                                                             | 1.1-4.5 µg/l (amniotic fluid) Jensen et al., 2012                                                                                                                                                                                                                                                                                                                                                                                               | 538.23 g/mol                 | 0.8 10-8M (4.5µg/l)     | 0.8 10-9M                               | 0.8 10-8M                             | 0.8 10-7M                              | 0.8 10-3M                                                 | 8                                                   |
| 11 | Poly aromatic Hydroxylated compounds (PAHs) | 2-Napthol_ 135-19-3                                                           | fluorescent colorless crystallin solid (naphthalen derivative) | 100%(100%)                                                    | none                                                                                                                                                    | 2.49µg/l in pregnant women (geometric mean) (50th percentile: 2.4µg/l; 95th percentile 14.7µg/l (Woodruff et al., 2011)                                                                                                                                                                                                                                        | [-; 0,893] mean 0,417 µg/l (Blount et al., 2009) _mean 0,440 µg/l (Amitai et al., 2007)                                                                                                                                                                  |                                                                                                                                                                                                  | 0.72µg/L median (amniotic fluid) Bradman et al., 2003                                                                                                                                                                                                                                                                                                                                                                                           | 144.17 g/mol                 | 0.5 10-8M (0.72µg/l)    | 0.5 10-9M                               | 0.5 10-8M                             | 0.5 10-7M                              | 0.5 10-3M                                                 | 5                                                   |
| 6  | Poly chlorinated                            | Sodium perchlorate Monohydrate (NaClO4)_ 7791-07-3                            | explosive properties used in aeronautics                       | 100%(100%)                                                    | Perchlorate : 0.3 µg/kg b.w                                                                                                                             | 4.3 µg/l (50th percentile; 95th percentile 34µg/l (Woodruff et al., 2011) 3.35µg/L (maternal urine)                                                                                                                                                                                                                                                            |                                                                                                                                                                                                                                                          |                                                                                                                                                                                                  | 0.057-0.38 µg/l (amniotic fluid) Blount et al., 2009                                                                                                                                                                                                                                                                                                                                                                                            | 122.44 g/mol                 | 0.3 10-8M (0.38µg/l)    | 0.3 10-9M                               | 0.3 10-8M                             | 0.310-7M                               | 0.3 10-3M                                                 | 7.5 µl (à partir de 1g/l)                           |
| 9  | Polybrominated compounds (PBDEs)            | Decabromodiphenylether (BDE 209 )_ 1163-19-5                                  | flame retardant                                                | 87% (68%)                                                     | 1,7µg/kg b.w                                                                                                                                            | 0.08-106.49µg/g creatinine (Ho & al., 2015)                                                                                                                                                                                                                                                                                                                    | 1.59 ng/g lipid weight (Ho & al., 2015)                                                                                                                                                                                                                  | 15.8 ± 9.88 ng/g- 1 lipid in placenta, 13.2 ± 7.64 ng/g- 1 lipid in breast milk, 16.5 ± 19.5 ng/g- 1 lipid in fetal cord blood, and 1.80 ± 1.99 ng/ml- 1 in neonatal urine. (Chen & al., 2014)   | 3795 pg/ml (all PBDE) 16% de BDE209 so: 607.2pg/ml ou ng/L Miller et al 2012                                                                                                                                                                                                                                                                                                                                                                    | 959.22 g/mol                 | 0.63 10-9M (607.2 ng/l) | 0.63 10-10M                             | 0.63 10-9M                            | 0.63 10-8M                             | 0.63 10-4M                                                | 0.63                                                |
| 10 | Polychlorinated compounds (PCBs)            | 2,2',4,4',5,5'-Hexachlorobiphenyl (PCB 153)_35065-27-1                        | flame retardant found in Arochlor (PCB mixture) (banned)       | 100% (100%)                                                   | 20 ng/kg b.w./day                                                                                                                                       |                                                                                                                                                                                                                                                                                                                                                                | 50th percentile: 8.8µg/g lipid; 95th percentile 22.5 µg/g lipid (Woodruff et al., 2011) Danish mother : 1,303µg/l (median) or 152 ng/g lipid in serum (Kristensen et al., 2016)                                                                          | 0.97 µg/l Portugal (cord blood) Lopes et al 2014 0.04ng/ml (wet) cord blood 0.21µg/l German (Bucholski et al., 1996) 0.38µg/l Slovakia (Park et al., 2008) 0.21µg/l Spain (Grimalt et al., 2010) | 0.009µg/l (Luzardo & al, 2009) 0.064µg/l (Meeker et al., 2009) 0.16µg/l (in Germany Van der Ven et al., 1992 0.02µg/l (in Tanzania Van der Ven et al., 1992) 3.8µµl (Daglioglu et al., 2013)                                                                                                                                                                                                                                                    | 360.88g/mol                  | 0.2 10-9M               | 0.2 10-8M                               | 0.2 10-7M                             | 0.2 10-3M                              | 2                                                         |                                                     |
| 14 | Heavy metals                                | Methyl mercury (MeHg Cl)_ 115-09-3                                            |                                                                | 89% (92%)                                                     | 1.3 µg/kg b.w./week (TWI not per day) 0.035 to 0.08µg/kg/day                                                                                            |                                                                                                                                                                                                                                                                                                                                                                | 63µg/L (Obiri et al, 2016) -Ghana                                                                                                                                                                                                                        |                                                                                                                                                                                                  | 0.2 µg/l max 11µg/l (amniotic fluid) mercury Kozikowska et al., 2013 0.37 µg/l (Pier Franca Luglie et a 2005)                                                                                                                                                                                                                                                                                                                                   | 215.62 g/mol                 | 0.5 10-7M (11 µg/l)     | 0.5 10-8M                               | 0.5 10-7M                             | 0.5 10-6M                              | 0.5 10-2M                                                 | 50                                                  |
| 15 | Heavy metals                                | Lead (II) chloride (PbCl2)_ 7758-95-4                                         | pigments, fuels                                                | 94% (99%)                                                     | ADI (acceptable daily intake) 7µg/kg/day                                                                                                                | Median : 0.5µg/L (Christensen, 2012)                                                                                                                                                                                                                                                                                                                           | 1.290 µg/dL ±0.578 (Baranowska-Bosiack et al, 2016)( Pregnant mothers) 5th-95th percentile(Nunes et al, 2010) en µg/L 8.0-47.0 German 5.0-132.0 UK 39.7-275.7 Italian 11.4-62.8 French 3.5-170.0 Swedish 5.1-163.0 Brazil 58µg/L (Obiri&al, 2016) -Ghana | 30µg/l (Semczuk et al., 1998) 24µg/l (Semczuk et al 1994) in breast milk : 0.174 µg/dL ±1.15 (Baranowska-Bosiack et al, 2016)                                                                    |                                                                                                                                                                                                                                                                                                                                                                                                                                                 | 278.108 g/mol                | 0.21 10-6M (59.6µg/l)   | 0.21 10-9M                              | 0.21 10-8M                            | 0.21 10-7M                             | 0.21 10-3M                                                | 2.1                                                 |

## Supplementary References related to Supplementary Table 1

- Amitai, Y., et al. (2007), 'Gestational exposure to high perchlorate concentrations in drinking water and neonatal thyroxine levels', *Thyroid*, 17 (9), 843-50.
- Aris, A. (2014), 'Estimation of bisphenol A (BPA) concentrations in pregnant women, fetuses and nonpregnant women in Eastern Townships of Canada', *Reprod Toxicol*, 45, 8-13.
- Baranowska-Bosiacka, I., et al. (2016), 'Environmental Lead (Pb) Exposure Versus Fatty Acid Content in Blood and Milk of the Mother and in the Blood of Newborn Children', *Biol Trace Elem Res*, 170 (2), 279-87.
- Blount, B. C., et al. (2009), 'Perinatal exposure to perchlorate, thiocyanate, and nitrate in New Jersey mothers and newborns', *Environ Sci Technol*, 43 (19), 7543-9.
- Bradman, A., et al. (2003), 'Measurement of pesticides and other toxicants in amniotic fluid as a potential biomarker of prenatal exposure: a validation study', *Environ Health Perspect*, 111 (14), 1779-82.
- Burstyn, I., et al. (2013), 'Maternal exposure to bisphenol-A and fetal growth restriction: a case-referent study', *Int J Environ Res Public Health*, 10 (12), 7001-14.
- Cariou, R., et al. (2015), 'Perfluoroalkyl acid (PFAA) levels and profiles in breast milk, maternal and cord serum of French women and their newborns', *Environ Int*, 84, 71-81.
- Chen, M., et al. (2011), 'Determination of bisphenol-A levels in human amniotic fluid samples by liquid chromatography coupled with mass spectrometry', *J Sep Sci*, 34 (14), 1648-55.
- Chen, Z. J., et al. (2014), 'Polybrominated diphenyl ethers (PBDEs) in human samples of mother-newborn pairs in South China and their placental transfer characteristics', *Environ Int*, 73, 77-84.
- (2014), 'Polybrominated diphenyl ethers (PBDEs) in human samples of mother-newborn pairs in South China and their placental transfer characteristics', *Environ Int*, 73, 77-84.
- Christensen, K. L. Y. (2013), 'Metals in blood and urine, and thyroid function among adults in the United States 2007-2008', *International Journal of Hygiene and Environmental Health*, 216 (6), 624-32.
- Daglioglu, N., et al. (2013), 'Polychlorinated biphenyls and organochlorine pesticides in amniotic fluids of pregnant women in south-central Turkey', *Toxicological and Environmental Chemistry*, 95 (6), 954-61.
- Edlow, A. G., et al. (2012), 'Fetal bisphenol A exposure: concentration of conjugated and unconjugated bisphenol A in amniotic fluid in the second and third trimesters', *Reprod Toxicol*, 34 (1), 1-7.
- Foster, W., et al. (2000), 'Detection of endocrine disrupting chemicals in samples of second trimester human amniotic fluid', *J Clin Endocrinol Metab*, 85 (8), 2954-7.
- Gerona, R. R., et al. (2013), 'Bisphenol-A (BPA), BPA glucuronide, and BPA sulfate in midgestation umbilical cord serum in a northern and central California population', *Environ Sci Technol*, 47 (21), 12477-85.
- Grimalt, J. O., et al. (2010), 'An evaluation of the sexual differences in the accumulation of organochlorine compounds in children at birth and at the age of 4 years', *Environ Res*, 110 (3), 244-50.
- Hines, E. P., et al. (2015), 'Concentrations of environmental phenols and parabens in milk, urine and serum of lactating North Carolina women', *Reprod Toxicol*, 54, 120-8.
- Hinwood, A. L., et al. (2013), 'Cadmium, lead and mercury exposure in non smoking pregnant women', *Environ Res*, 126, 118-24.
- Ho, K. L., et al. (2015), 'Urinary bromophenol glucuronide and sulfate conjugates: Potential human exposure molecular markers for polybrominated diphenyl ethers', *Chemosphere*, 133, 6-12.
- Huang, P. C., et al. (2009), 'Association between prenatal exposure to phthalates and the health of newborns', *Environ Int*, 35 (1), 14-20.
- Huang, Y., et al. (2014), 'Phthalate levels in cord blood are associated with preterm delivery and fetal growth parameters in Chinese women', *PLoS One*, 9 (2), e87430.
- Iwai-Shimada, M., et al. (2015), 'Methylmercury in the breast milk of Japanese mothers and lactational exposure of their infants', *Chemosphere*, 126, 67-72.
- Jensen, M. S., et al. (2012), 'Phthalates and perfluorooctanesulfonic acid in human amniotic fluid: temporal trends and timing of amniocentesis in pregnancy', *Environ Health Perspect*, 120 (6), 897-903.
- Jimenez-Diaz, I., et al. (2016), 'Urinary levels of bisphenol A, benzophenones and parabens in Tunisian women: A pilot study', *Sci Total Environ*, 562, 81-8.
- Kim, J. T., et al. (2015), 'Partitioning behavior of heavy metals and persistent organic pollutants among fetomaternal bloods and tissues', *Environ Sci Technol*, 49 (12), 7411-22.
- Korpela, H., et al. (1986), 'Lead and cadmium concentrations in maternal and umbilical cord blood, amniotic fluid, placenta, and amniotic membranes', *Am J Obstet Gynecol*, 155 (5), 1086-9.

- Kozikowska, I., et al. (2013), 'Mercury concentrations in human placenta, umbilical cord, cord blood and amniotic fluid and their relations with body parameters of newborns', *Environ Pollut*, 182, 256-62.
- Kristensen, S. L., et al. (2016), 'Prenatal exposure to persistent organochlorine pollutants and female reproductive function in young adulthood', *Environ Int*, 92-93, 366-72.
- LeFeng, W., et al. (2015), 'Association of urinary metal profiles with altered glucose levels and diabetes risk: a population-based study in China', *PLoS One*, 10 (4), e0123742.
- Li, Y. F., et al. (2008), 'Mercury in human hair and blood samples from people living in Wanshan mercury mine area, Guizhou, China: an XAS study', *J Inorg Biochem*, 102 (3), 500-6.
- Lopez-Espinosa, M. J., et al. (2010), 'Prenatal exposure to organochlorine compounds and neonatal thyroid stimulating hormone levels', *J Expo Sci Environ Epidemiol*, 20 (7), 579-88.
- Luglie, P. F., et al. (2005), 'Effect of amalgam fillings on the mercury concentration in human amniotic fluid', *Arch Gynecol Obstet*, 271 (2), 138-42.
- Luzardo, O. P., et al. (2009), 'Determinants of organochlorine levels detectable in the amniotic fluid of women from Tenerife Island (Canary Islands, Spain)', *Environ Res*, 109 (5), 607-13.
- McKean, S. J., et al. (2015), 'Prenatal mercury exposure, autism, and developmental delay, using pharmacokinetic combination of newborn blood concentrations and questionnaire data: a case control study', *Environ Health*, 14, 62.
- Meeker, J. D., et al. (2009), 'Serum and follicular fluid organochlorine concentrations among women undergoing assisted reproduction technologies', *Environ Health*, 8, 32.
- Mohr, S., et al. (2015), 'Polychlorinated biphenyls in umbilical cord serum of newborns from Rio Grande do Sul state, Brazil', *Clin Chim Acta*, 451 (Pt B), 323-8.
- Nunes, J. A., et al. (2010), 'A simple method based on ICP-MS for estimation of background levels of arsenic, cadmium, copper, manganese, nickel, lead, and selenium in blood of the Brazilian population', *J Toxicol Environ Health A*, 73 (13-14), 878-87.
- Obiri, S., et al. (2016), 'Levels of arsenic, mercury, cadmium, copper, lead, zinc and manganese in serum and whole blood of resident adults from mining and non-mining communities in Ghana', *Environ Sci Pollut Res Int*.
- Park, J. S., et al. (2008), 'Placental transfer of polychlorinated biphenyls, their hydroxylated metabolites and pentachlorophenol in pregnant women from eastern Slovakia', *Chemosphere*, 70 (9), 1676-84.
- Philippat, C., et al. (2013), 'Prenatal exposure to environmental phenols: concentrations in amniotic fluid and variability in urinary concentrations during pregnancy', *Environ Health Perspect*, 121 (10), 1225-31.
- Rocha, G. H. O., et al. (2016), 'Trace metal levels in serum and urine of a population in southern Brazil', *Journal of Trace Elements in Medicine and Biology*, 35, 61-65.
- Semczuk, M. and Semczuk-Sikora, A. (2001), 'New data on toxic metal intoxication (Cd, Pb, and Hg in particular) and Mg status during pregnancy', *Med Sci Monit*, 7 (2), 332-40.
- Shekhar, S., et al. (2016), 'Detection of phenolic endocrine disrupting chemicals (EDCs) from maternal blood plasma and amniotic fluid in Indian population', *Gen Comp Endocrinol*.
- Strain, J. J., et al. (2008), 'Associations of maternal long-chain polyunsaturated fatty acids, methyl mercury, and infant development in the Seychelles Child Development Nutrition Study', *Neurotoxicology*, 29 (5), 776-82.
- Su, P. H., et al. (2015), 'Thyroid and growth hormone concentrations in 8-year-old children exposed in utero to dioxins and polychlorinated biphenyls', *J Toxicol Sci*, 40 (3), 309-19.
- van der Ven, K., et al. (1992), 'Chlorinated hydrocarbon content of fetal and maternal body tissues and fluids in full term pregnant women: a comparison of Germany versus Tanzania', *Hum Reprod*, 7 Suppl 1, 95-100.
- Woodruff, T. and Morello-Frosch, R. (2011), 'Communicating about chemical body burden, with Tracey Woodruff and Rachel Morello-Frosch', *Environ Health Perspect*, 119 (5).
- Zeng, Q., et al. (2015), 'Urinary metal concentrations in relation to semen quality: a cross-sectional study in China', *Environ Sci Technol*, 49 (8), 5052-9.
- Zhang, Y., et al. (2009), 'Phthalate levels and low birth weight: a nested case-control study of Chinese newborns', *J Pediatr*, 155 (4), 500-4.
- Zheng, J., et al. (2016), 'Polychlorinated Biphenyls (PCBs) in Human Hair and Serum from E-Waste Recycling Workers in Southern China: Concentrations, Chiral Signatures, Correlations, and Source Identification', *Environ Sci Technol*, 50 (3), 1579-86.
